# Supplementary material for: Depression Subtypes in Predicting Antidepressant Response: A Report From the iSPOT-D Trial
Source: Atypon-hosted journal article supplement (doi:10.1176/appi.ajp.2015.14020181), 2015-03-29
Supplement: appi.ajp.2015.14020181.ds001.pdf [file appi.ajp.2015.14020181.ds001.pdf]

**FIGURE S1. CONSORT Diagram for the iSPOT-D Trial**

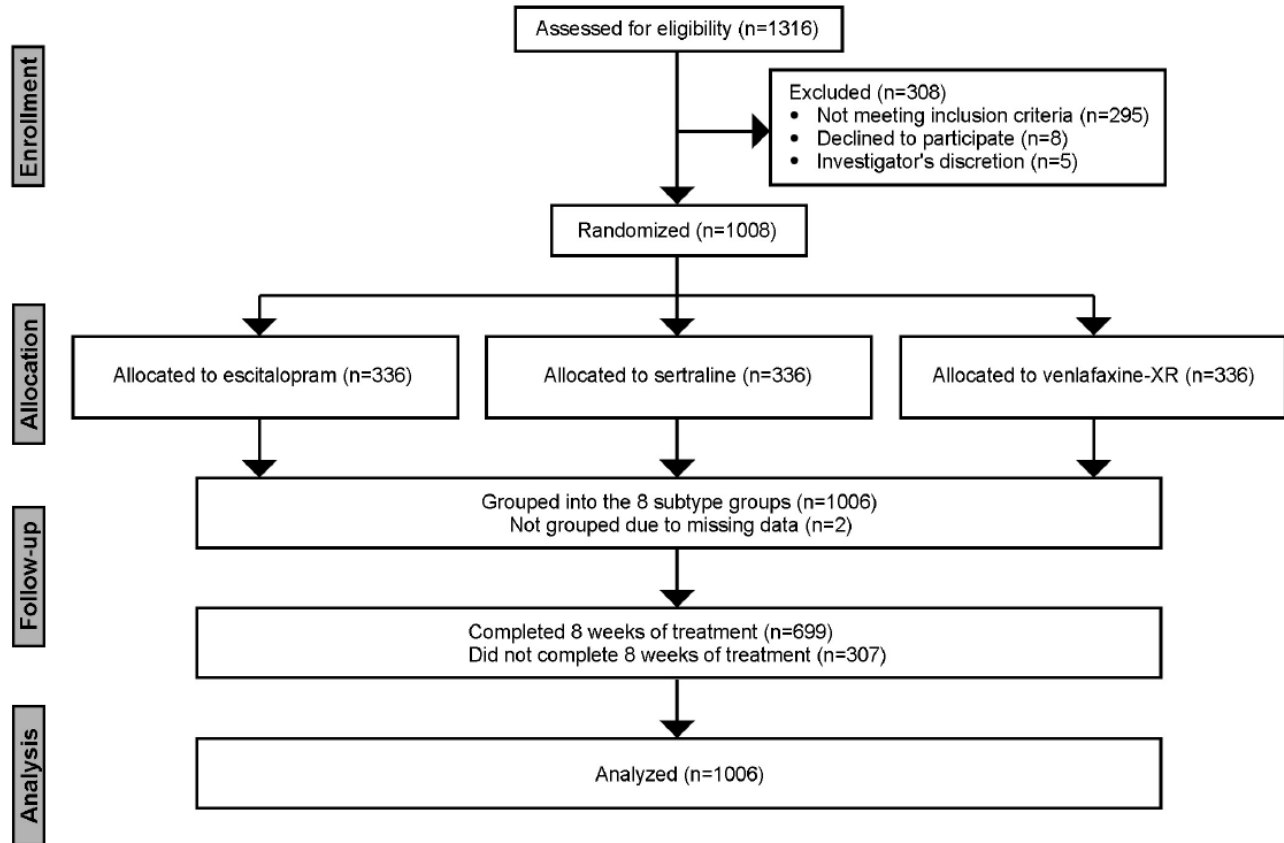

**TABLE S1. Proportion of Patients in the iSPOT-D and STAR\*D Trials Meeting the Remission Criterion, by Subtype<sup>a</sup>**

| Participant Subtypes | iSPOT-D                |                 |                   |                 | STAR*D                 |                 |                   |                 |
|----------------------|------------------------|-----------------|-------------------|-----------------|------------------------|-----------------|-------------------|-----------------|
|                      | Intent-to-Treat Sample |                 | Completer Sample  |                 | Intent-to-Treat Sample |                 | Completer Sample  |                 |
|                      | Group Size<br>(N)      | Remitted<br>(%) | Group Size<br>(N) | Remitted<br>(%) | Group Size<br>(N)      | Remitted<br>(%) | Group Size<br>(N) | Remitted<br>(%) |
| All participants     | 1,006                  | 26              | 699               | 38              | 2,874                  | 33              | 2,032             | 41              |
| No subtype           | 253                    | 26              | 165               | 40              | 958                    | 41              | 727               | 49              |
| Atypical             | 153                    | 30              | 113               | 41              | 192                    | 38              | 141               | 40              |
| Melancholic          | 107                    | 22              | 68                | 34              | 169                    | 29              | 122               | 35              |
| Anxious              | 130                    | 31              | 97                | 41              | 817                    | 30              | 550               | 38              |
| Anxious/atypical     | 131                    | 26              | 95                | 36              | 232                    | 25              | 170               | 33              |
| Melancholic/anxious  | 54                     | 20              | 40                | 28              | 390                    | 27              | 250               | 36              |
| Melancholic/atypical | 71                     | 27              | 50                | 38              | 26                     | 42              | 16                | 56              |
| All three subtypes   | 107                    | 21              | 71                | 32              | 90                     | 14              | 56                | 21              |

<sup>a</sup> iSPOT-D=International Study to Predict Optimized Treatment in Depression; STAR\*D=Sequenced Treatment Alternatives to Relieve Depression. The STAR\*D data are from step 1 of the trial. Remission was defined as a score  $\leq 5$  on the 16-item Quick Inventory of Depressive Symptomatology–Self-Report. Missing data were estimated using a mixed model for repeated measures, with fixed effects for treatment group, age, and gender. Logistic regression indicated no statistical differences in likelihood of remission after covarying for age, gender, and baseline severity.
